# Supplementary material
Source: PubMed Central journal article supplement (PMC7125705)

# Supplementary Figure S1A

'00' methylation profile

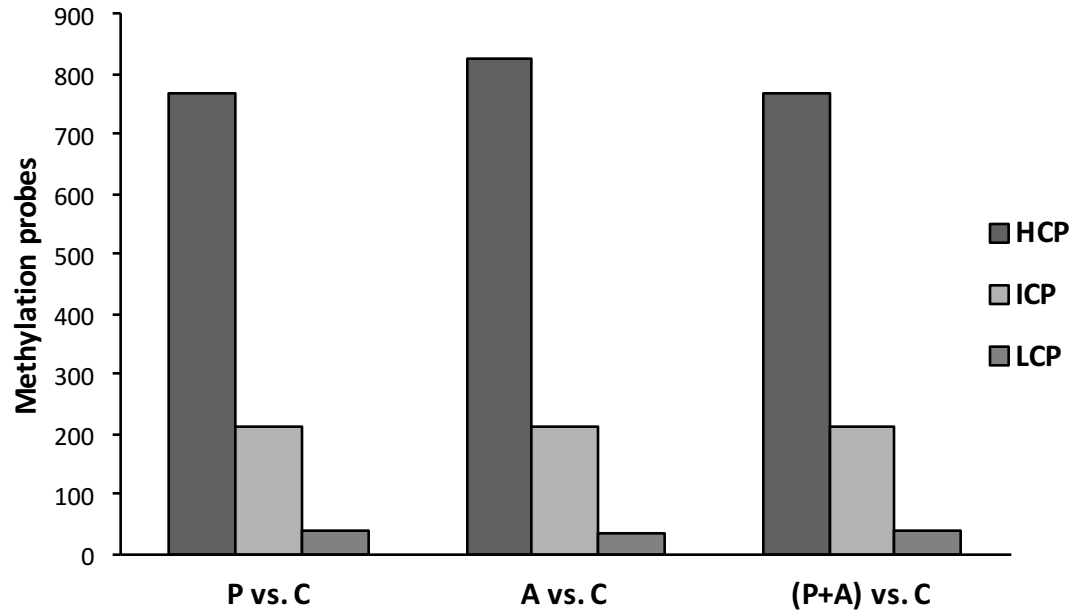

# Supplementary Figure S1B

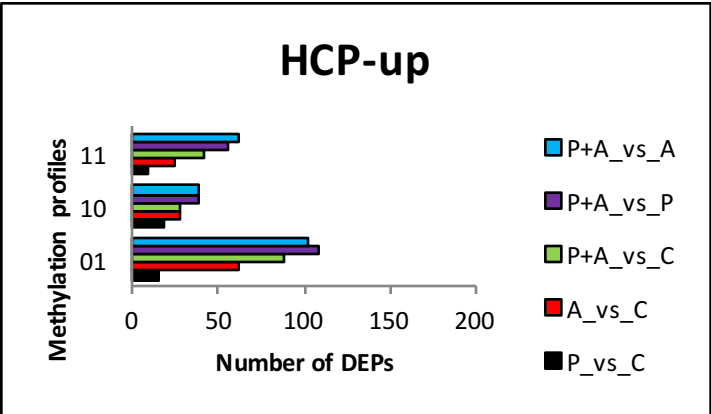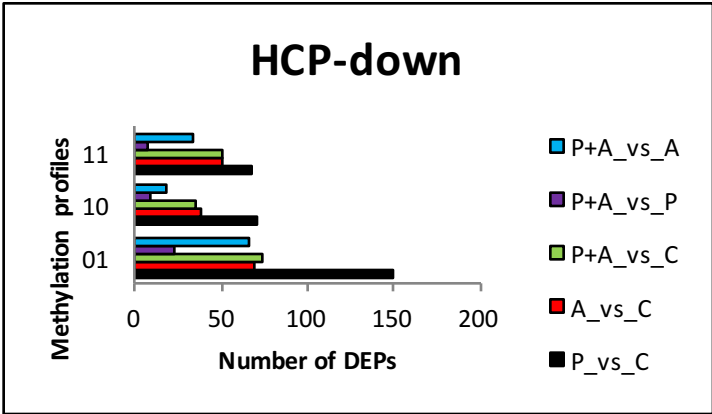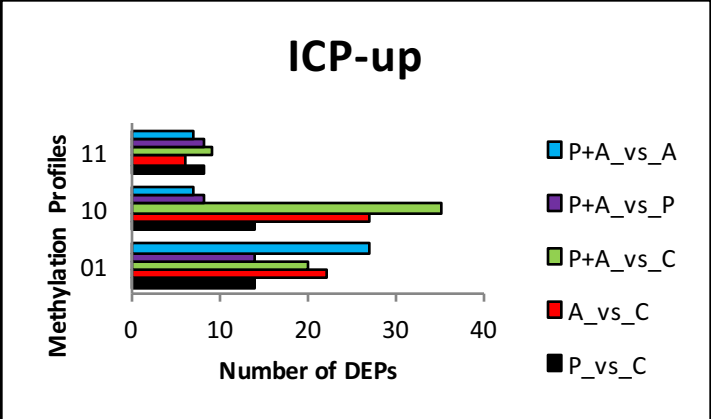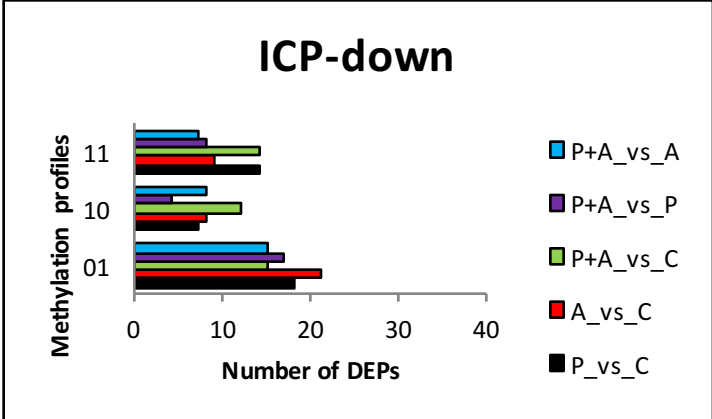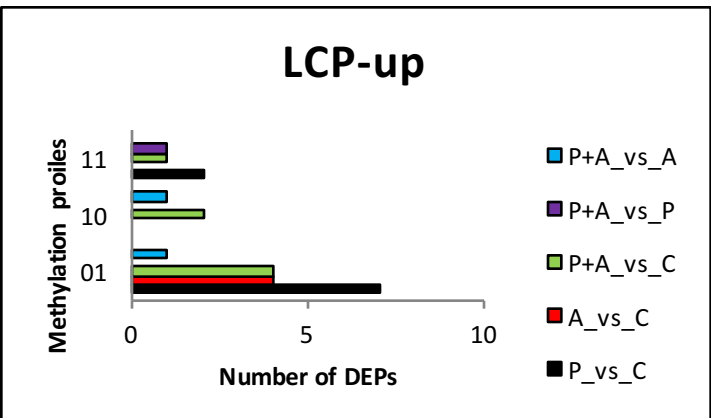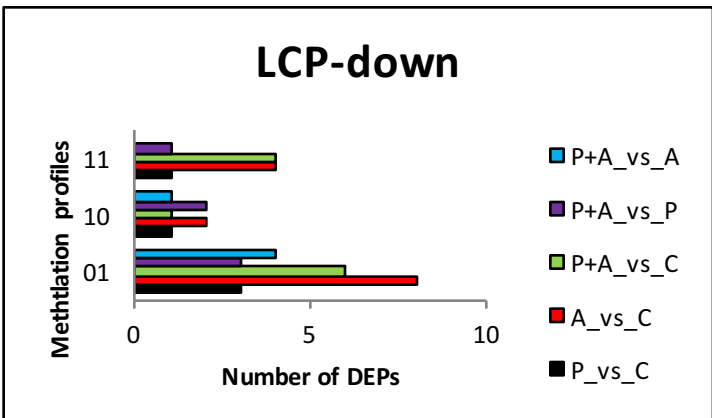

# Supplementary Figure S2

**P vs. C**

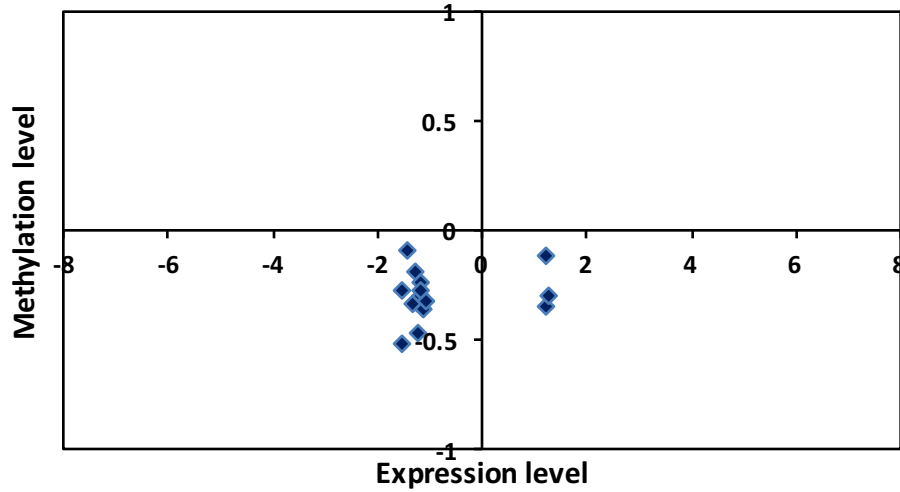

**A vs. C**

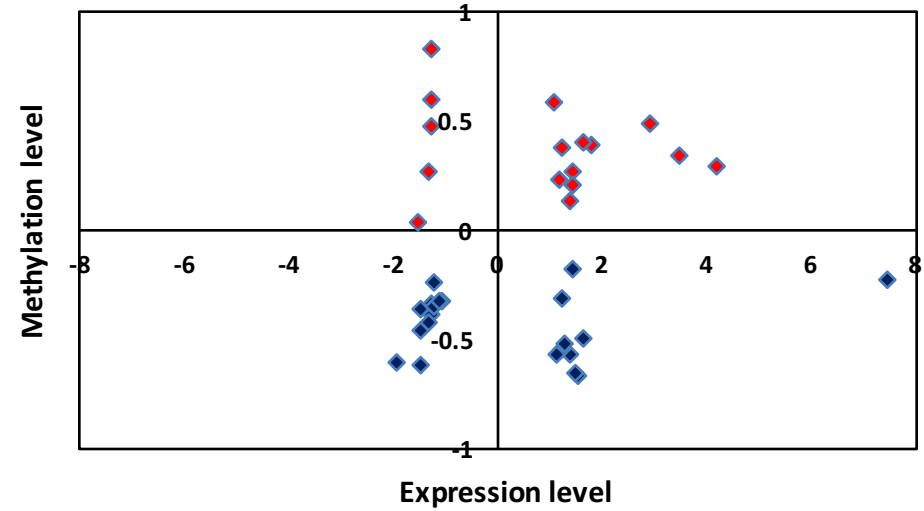

**(P+A) vs. C**

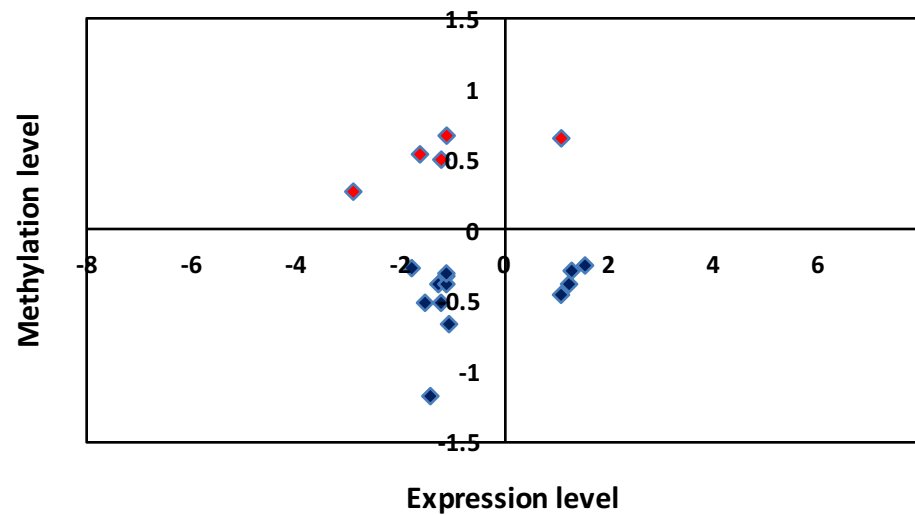

# Supplementary Figure S3

A

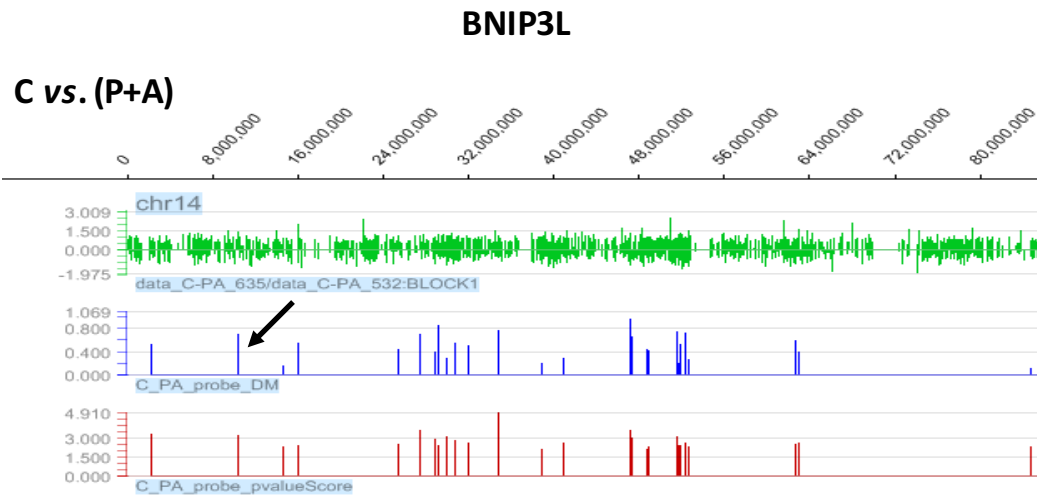

B

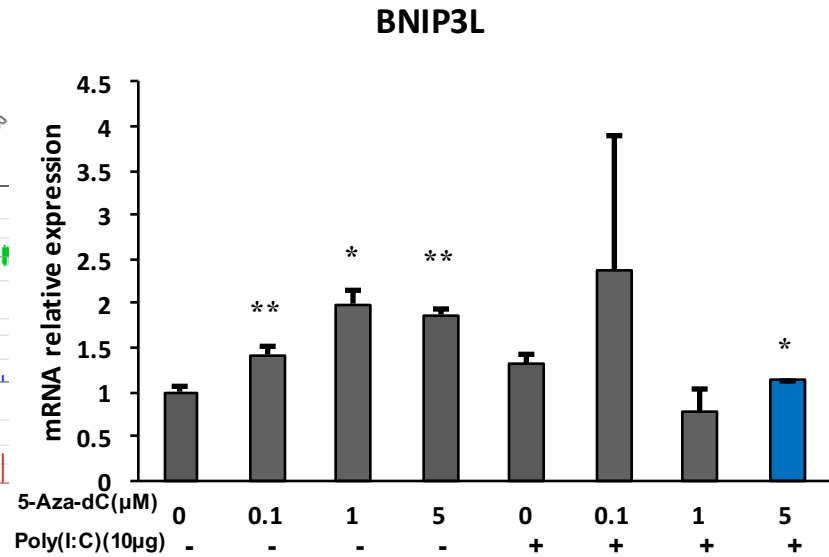

C

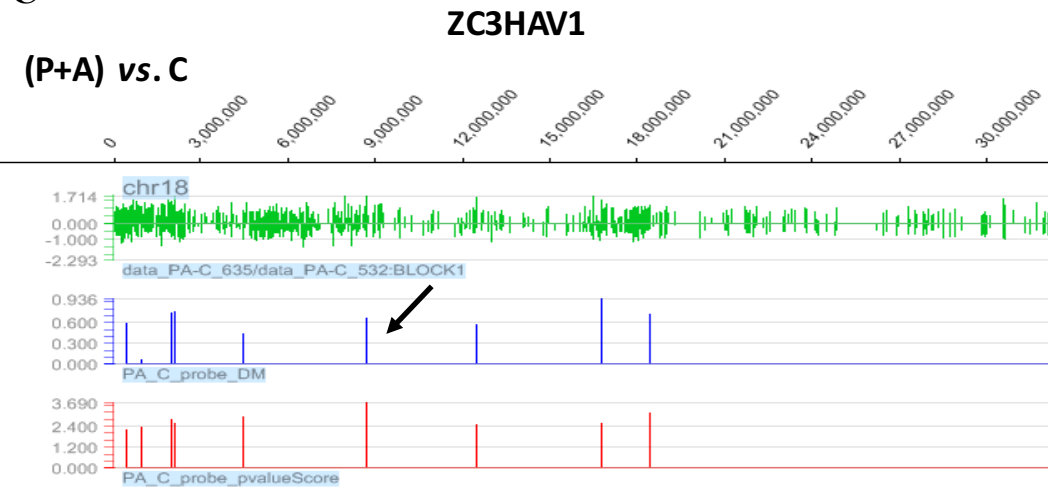

D

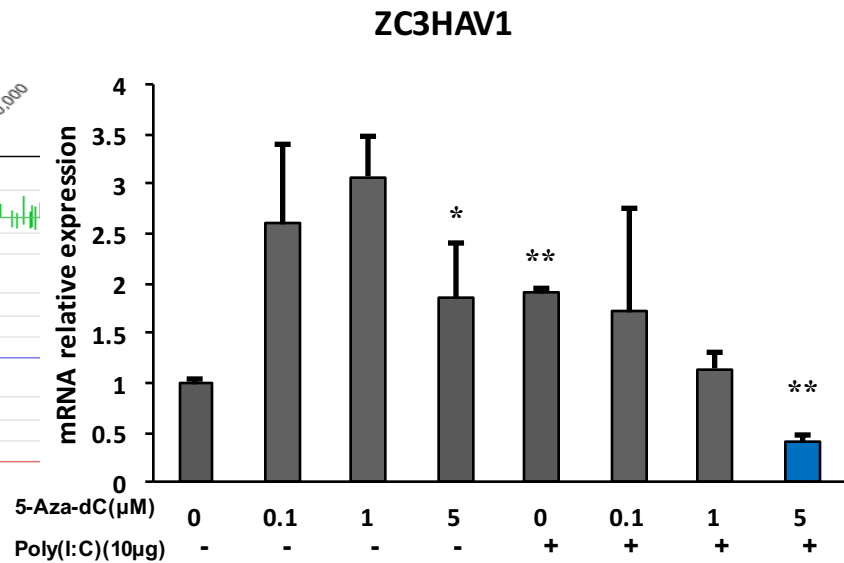

# Supplementary Figure S4

A

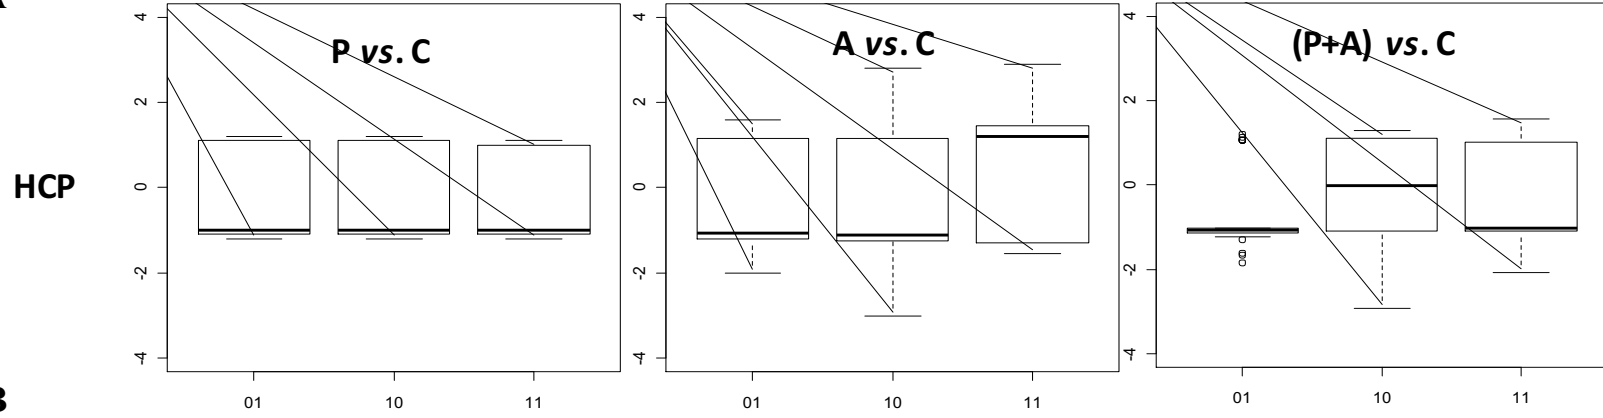

B

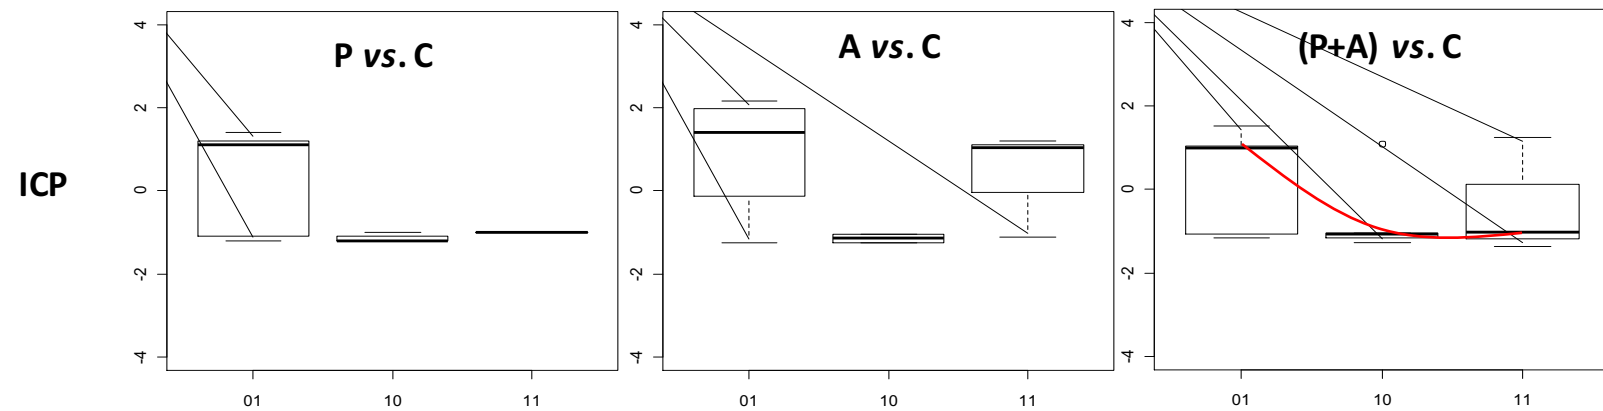

C

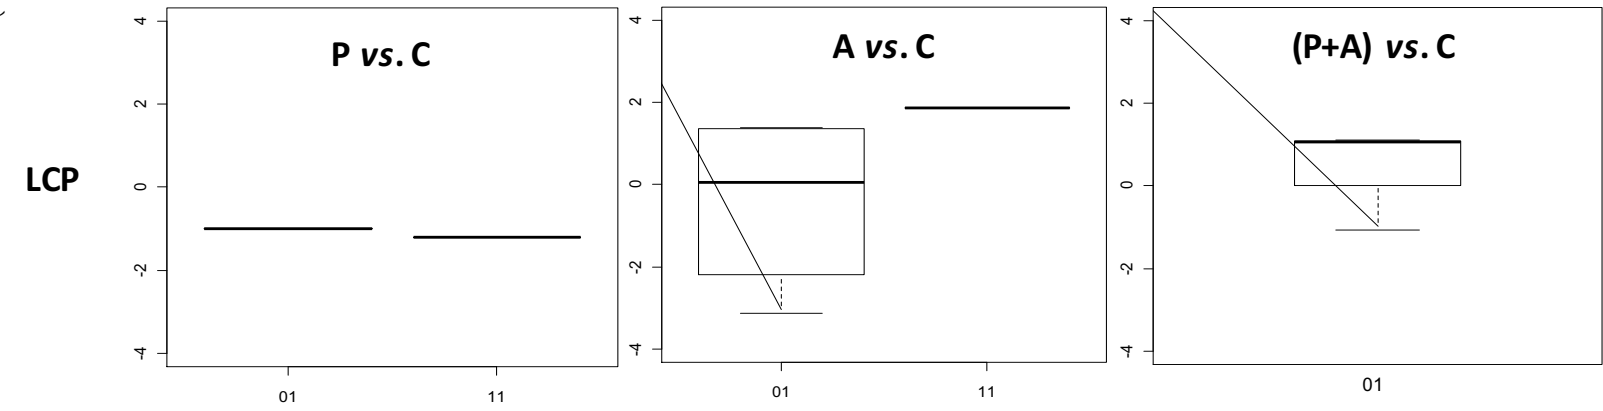

Supplement: mmc1.pdf [file mmc1.pdf]
